# Supplementary material for: Six-year outcomes of robot-assisted radical prostatectomy versus volumetric modulated arc therapy for localized prostate cancer: A propensity score-matched analysis
Source: PubMed Central journal article supplement (PMC11272719; doi:10.1007/s00066-023-02192-5), 2024-01-05
Supplement: 66_2023_2192_MOESM1_ESM.pdf [file 66_2023_2192_MOESM1_ESM.pdf]

**(A) Original cohort (before matching;  $n = 860$ )**

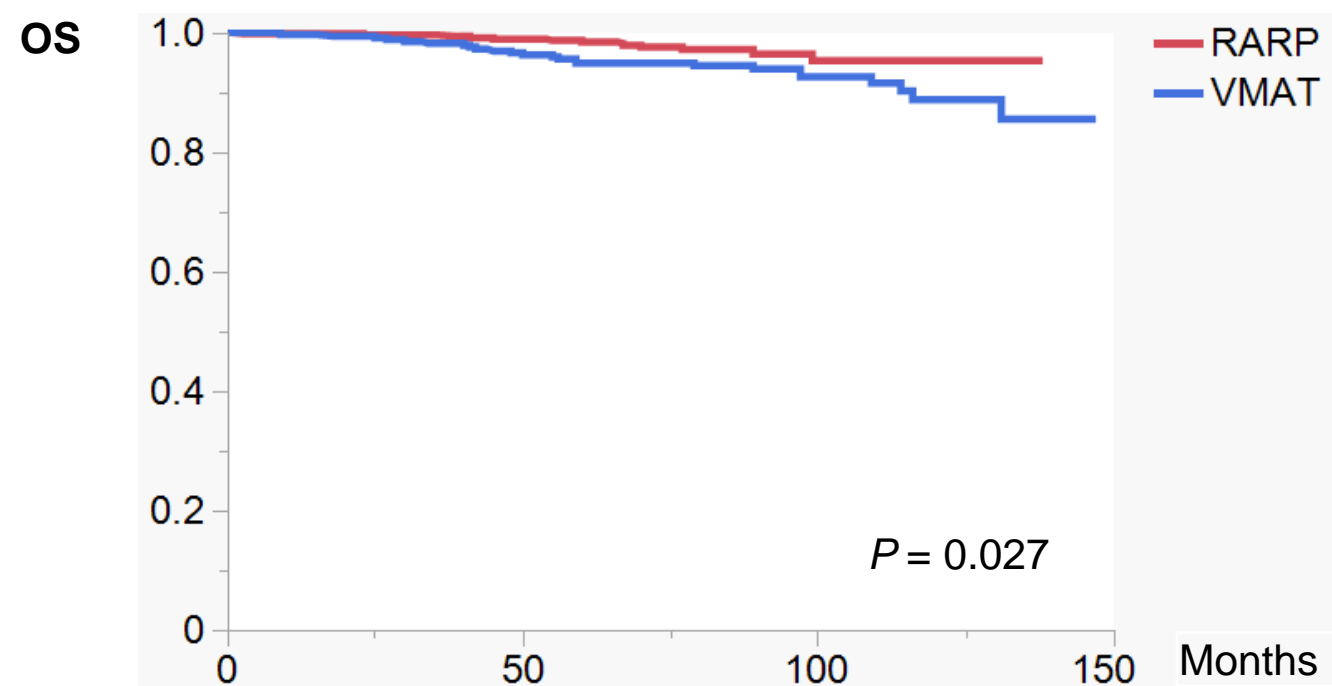

Number at risk:

|      |     |     |     |   |
|------|-----|-----|-----|---|
| RARP | 500 | 439 | 77  | 0 |
| VMAT | 360 | 296 | 114 | 0 |

**(B) Original cohort (before matching;  $n = 860$ )**

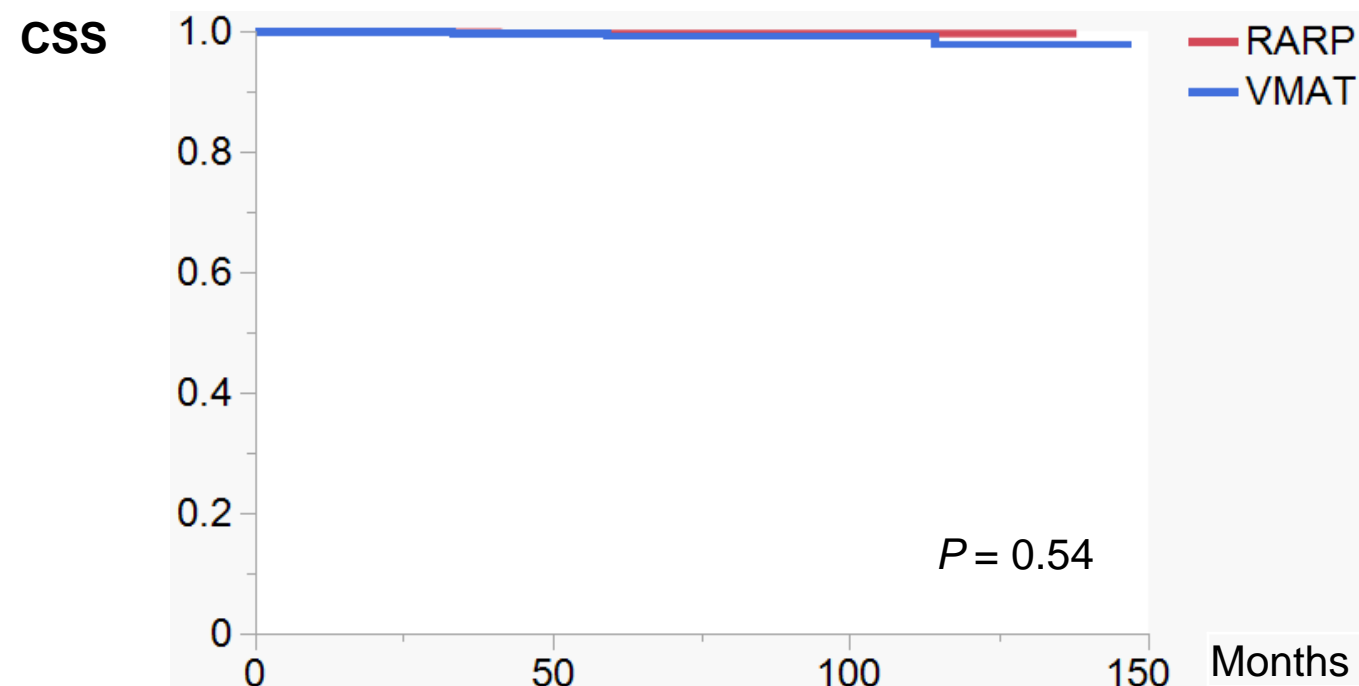

Number at risk:

|      |     |     |     |   |
|------|-----|-----|-----|---|
| RARP | 500 | 439 | 77  | 0 |
| VMAT | 360 | 296 | 114 | 0 |

**(C) Original cohort (before matching;  $n = 860$ )**

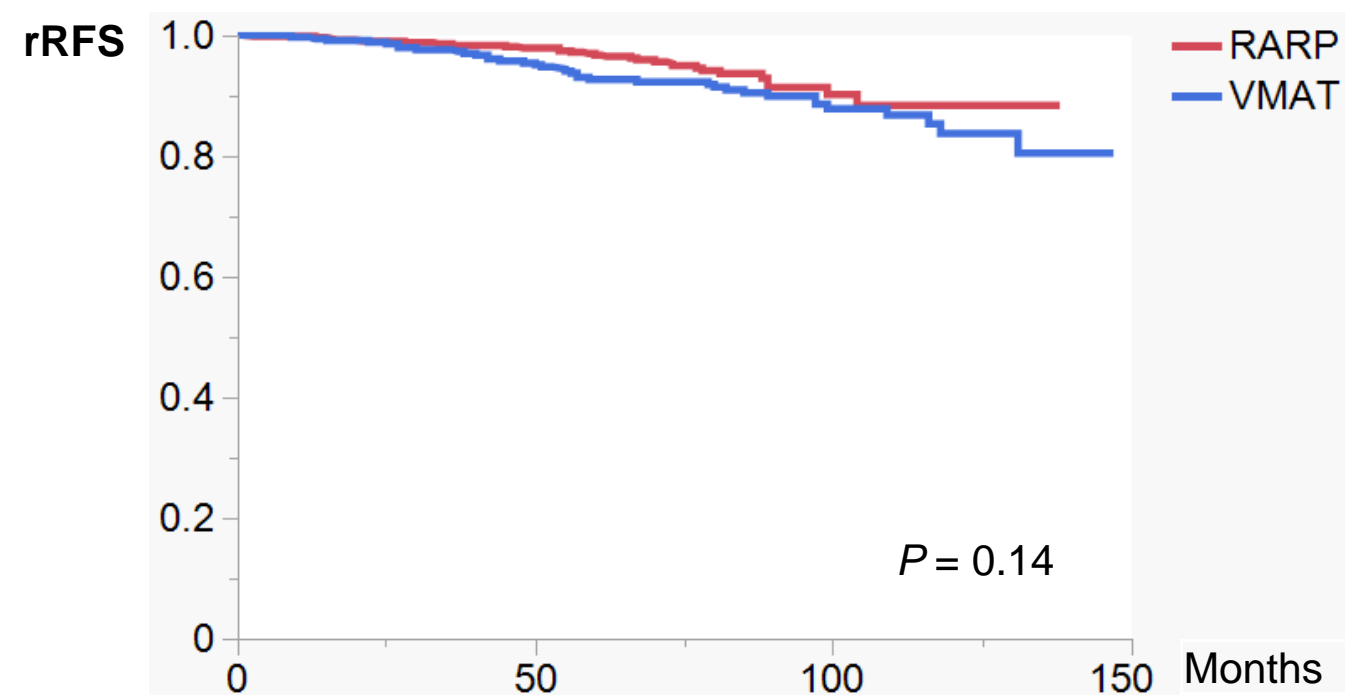

Number at risk:

|      |     |     |     |   |
|------|-----|-----|-----|---|
| RARP | 500 | 434 | 71  | 0 |
| VMAT | 360 | 291 | 107 | 0 |

**(D) Original cohort (before matching;  $n = 860$ )**

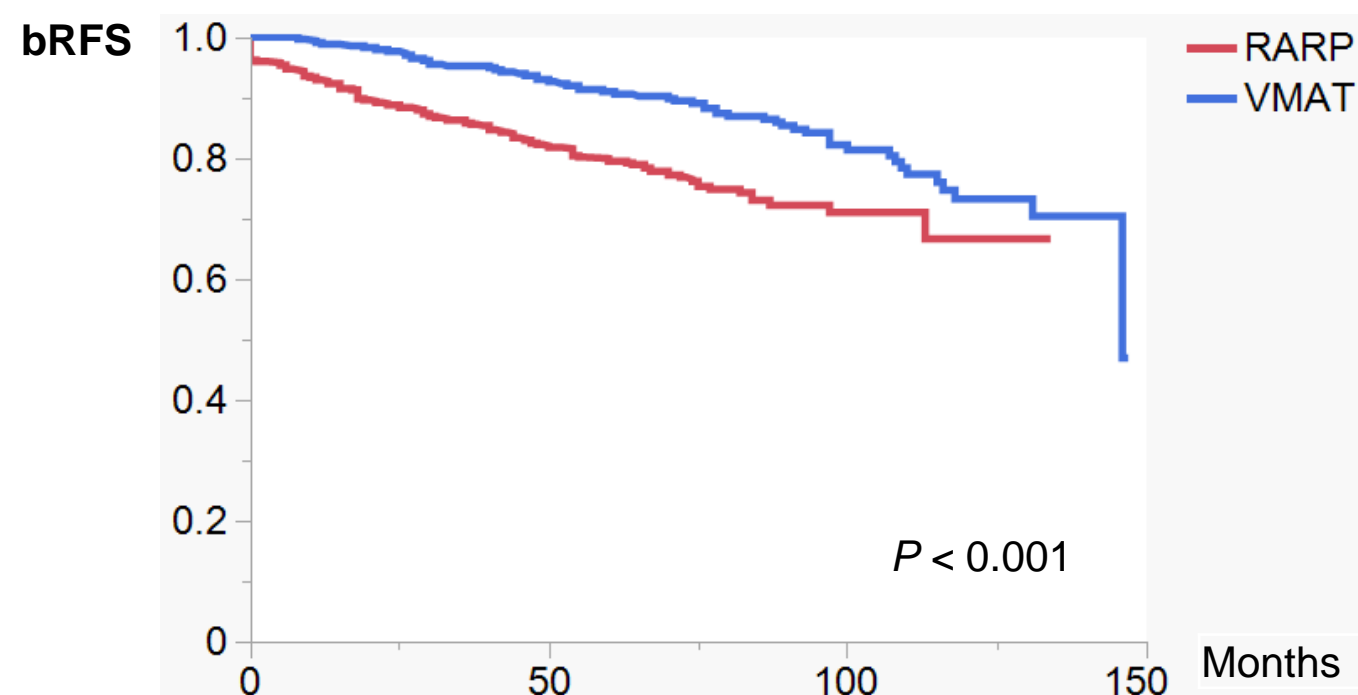

Number at risk:

|      |     |     |    |   |
|------|-----|-----|----|---|
| RARP | 500 | 360 | 46 | 0 |
| VMAT | 360 | 284 | 99 | 0 |
