# Supplementary material for: Six-year outcomes of robot-assisted radical prostatectomy versus volumetric modulated arc therapy for localized prostate cancer: A propensity score-matched analysis
Source: PubMed Central journal article supplement (PMC11272719; doi:10.1007/s00066-023-02192-5), 2024-01-05
Supplement: 66_2023_2192_MOESM2_ESM.pdf [file 66_2023_2192_MOESM2_ESM.pdf]

**(A) Original cohort (before matching;  $n = 860$ )**

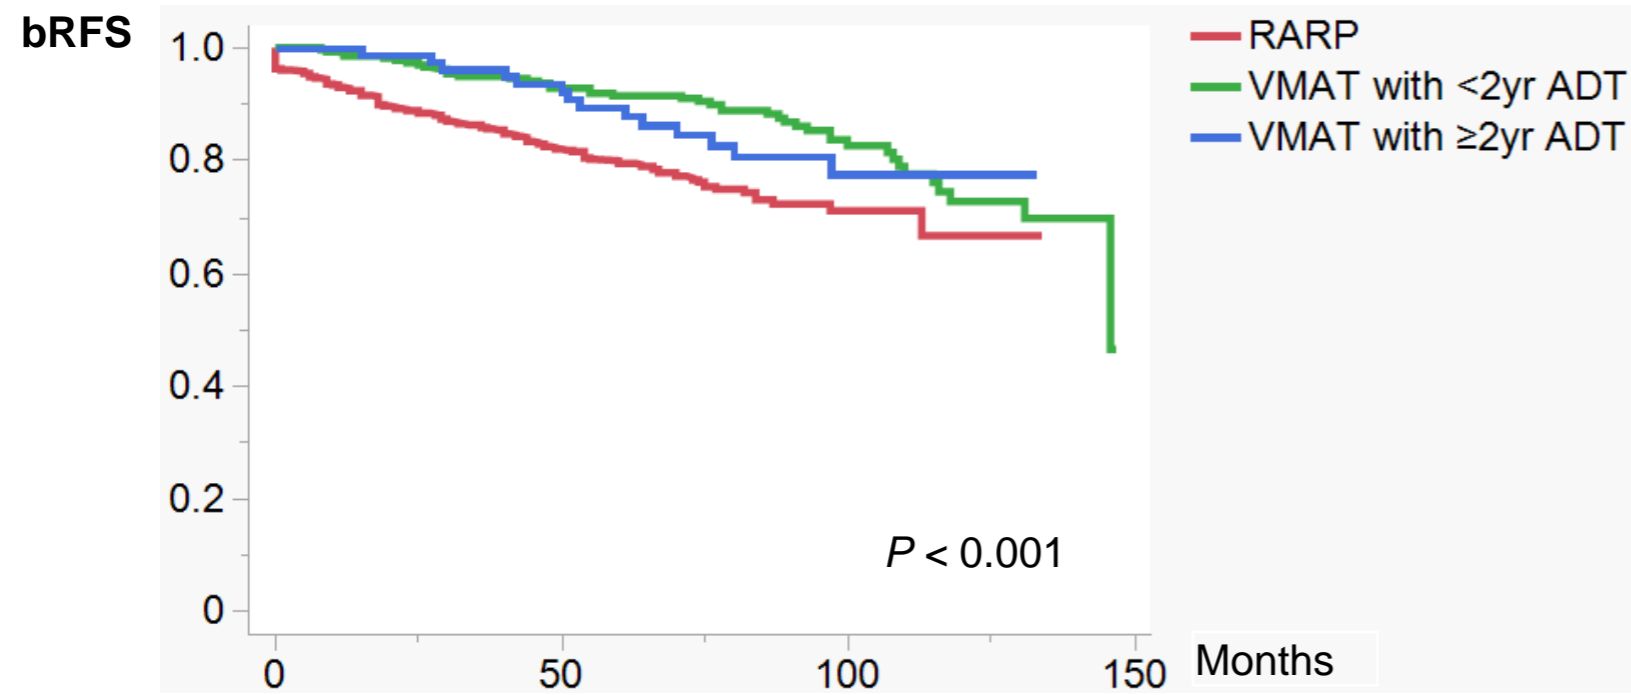

| Number at risk:    |     |     |     |     |
|--------------------|-----|-----|-----|-----|
|                    | 0   | 50  | 100 | 150 |
| RARP               | 500 | 360 | 46  | 0   |
| VMAT with <2yr ADT | 272 | 214 | 82  | 0   |
| VMAT with ≥2yr ADT | 88  | 70  | 17  | 0   |

$P < 0.001$  (RARP vs VMAT with <2yr ADT)  
 $P = 0.55$  (VMAT with <2yr ADT vs VMAT with ≥2yr ADT)  
 $P = 0.071$  (RARP vs VMAT with ≥2yr ADT)

**(B) Matched cohort ( $n = 260$ )**

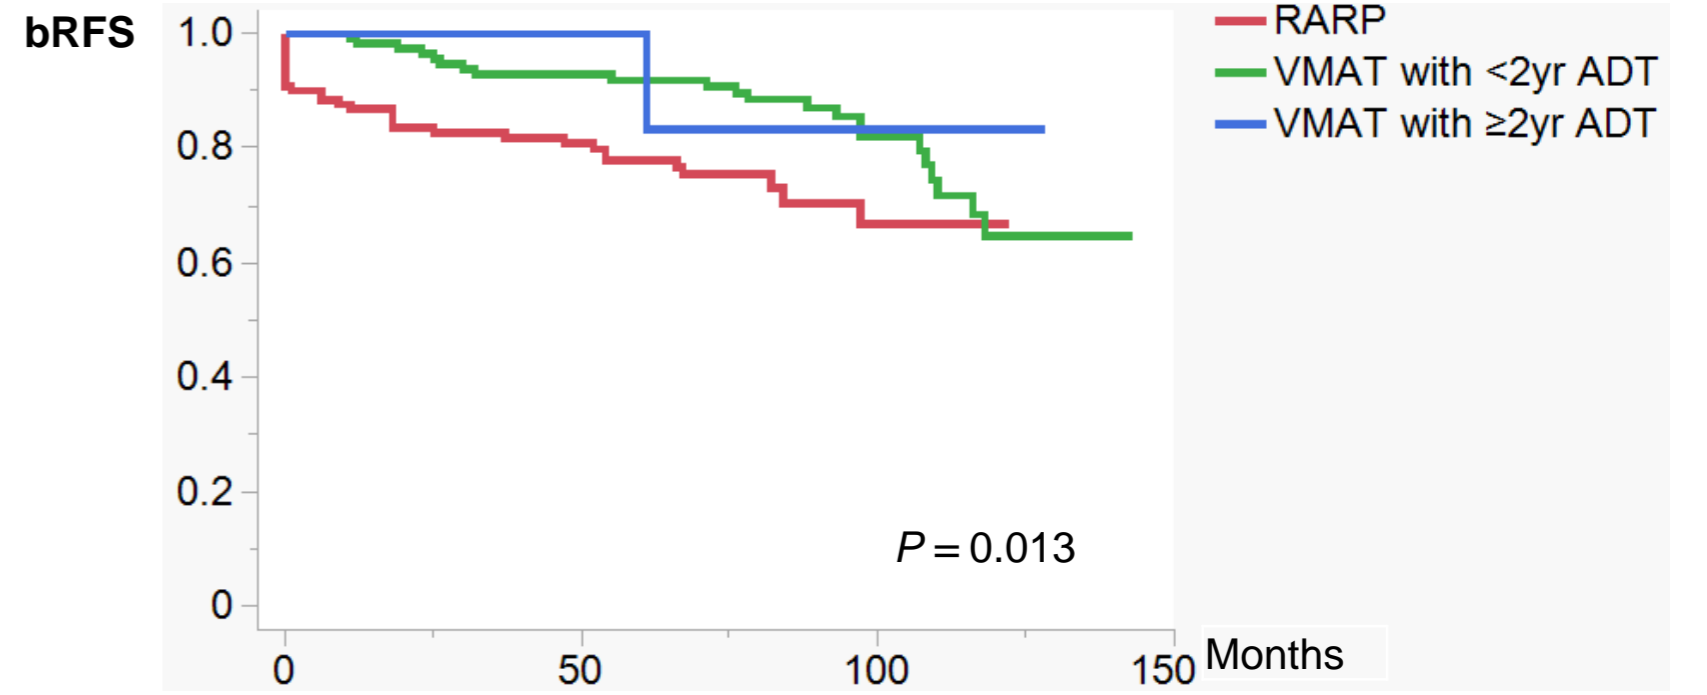

| Number at risk:    |     |    |     |     |
|--------------------|-----|----|-----|-----|
|                    | 0   | 50 | 100 | 150 |
| RARP               | 130 | 85 | 11  | 0   |
| VMAT with <2yr ADT | 122 | 95 | 39  | 0   |
| VMAT with ≥2yr ADT | 8   | 7  | 2   | 0   |

$P = 0.004$  (RARP vs VMAT with <2yr ADT)  
 $P = 0.75$  (VMAT with <2yr ADT vs VMAT with ≥2yr ADT)  
 $P = 0.37$  (RARP vs VMAT with ≥2yr ADT)
