# Supplementary material for: Six-year outcomes of robot-assisted radical prostatectomy versus volumetric modulated arc therapy for localized prostate cancer: A propensity score-matched analysis
Source: PubMed Central journal article supplement (PMC11272719; doi:10.1007/s00066-023-02192-5), 2024-01-05
Supplement: 66_2023_2192_MOESM3_ESM.pdf [file 66_2023_2192_MOESM3_ESM.pdf]

## Grade $\geq 2$ rectal bleeding

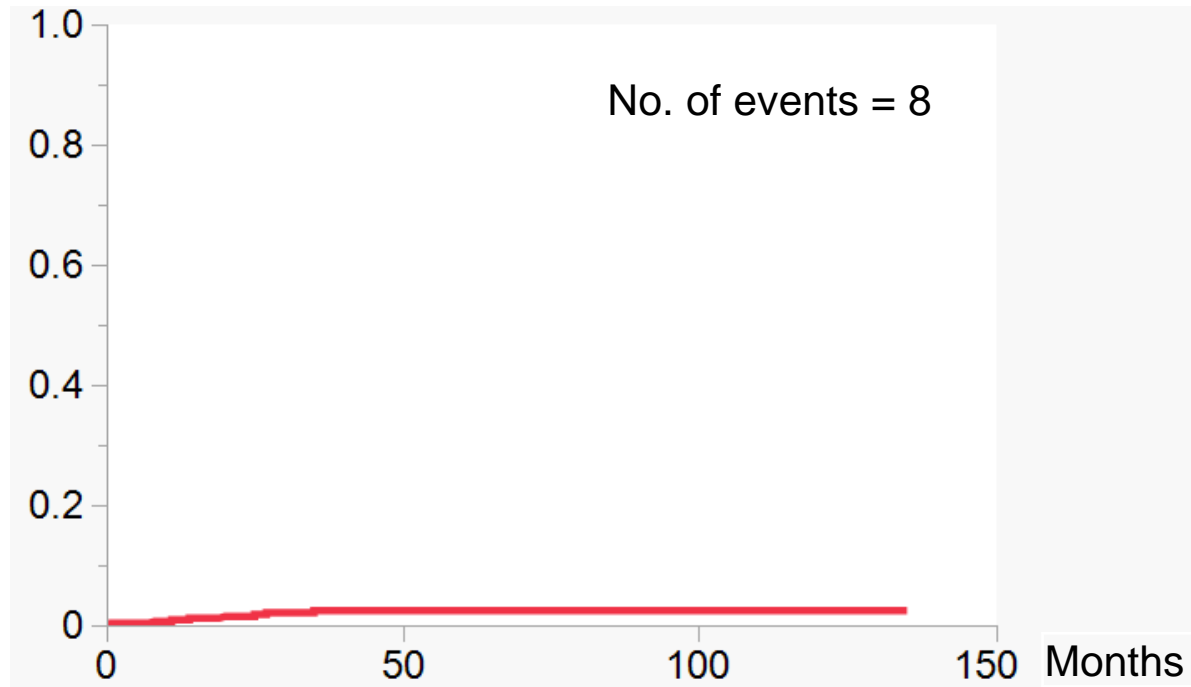

Number at risk:

|      |     |     |    |   |
|------|-----|-----|----|---|
| VMAT | 360 | 242 | 12 | 0 |
|------|-----|-----|----|---|
